# Supplementary material
Source: PubMed Central journal article supplement (PMC4791618)
Supplement: aasm.39.4.847s1.pdf [file aasm.39.4.847s1.pdf]

**Table S1.** Clinical characteristics of patients with Parkinson disease

| <b>Patient No.</b> | <b>Name</b> | <b>Sex</b> | <b>Age (y)</b> | <b>PD duration (y)</b> | <b>UPDRS</b> | <b>Hoehn &amp; Yahr</b> | <b>Degree of dysphagia</b> | <b>Drooling</b> |
|--------------------|-------------|------------|----------------|------------------------|--------------|-------------------------|----------------------------|-----------------|
| 1                  | AC          | M          | 76             | 3                      | 24           | 1.5                     | 1                          | +               |
| 2                  | AA          | M          | 69             | 10                     | 22           | 1                       | 1                          | +               |
| 3                  | AI          | F          | 59             | 9                      | 32           | 1.5                     | 1                          | -               |
| 4                  | AA          | F          | 51             | 5                      | 35           | 2                       | 3                          | -               |
| 5                  | DD          | M          | 80             | 4                      | 26           | 2                       | 1                          | -               |
| 6                  | EC          | M          | 76             | 14                     | 31           | 2.5                     | 2                          | -               |
| 7                  | FA          | F          | 57             | 12                     | 27           | 1                       | 1                          | -               |
| 8                  | GO          | F          | 66             | 14                     | 62           | 4                       | 3                          | +               |
| 9                  | GA          | M          | 53             | 9                      | 13           | 1                       | 3                          | +               |
| 10                 | HP          | M          | 68             | 11                     | 34           | 2.5                     | 1                          | -               |
| 11                 | HY          | F          | 65             | 7                      | 59           | 4                       | 1                          | +               |
| 12                 | IB          | M          | 73             | 13                     | 31           | 2                       | 2                          | +               |
| 13                 | KS          | M          | 73             | 4                      | 28           | 1                       | 1                          | -               |
| 14                 | MC          | M          | 78             | 7                      | 65           | 1.5                     | 1                          | +               |
| 15                 | MA          | M          | 67             | 9                      | 28           | 2.5                     | 1                          | +               |
| 16                 | OS          | M          | 73             | 17                     | 11           | 1                       | 1                          | -               |
| 17                 | SC          | M          | 73             | 11                     | 22           | 1.5                     | 1                          | -               |
| 18                 | SY          | F          | 72             | 19                     | 66           | 4                       | 1                          | +               |
| 19                 | SS          | F          | 74             | 21                     | 55           | 1.5                     | 1                          | +               |
| 20                 | TY          | F          | 61             | 7                      | 4            | 1                       | 1                          | +               |
| 21                 | YK          | M          | 63             | 15                     | 15           | 1                       | 1                          | +               |

PD = Parkinson disease; UPDRS = Unified Parkinson's Disease Rating Scale.
